# Supplementary material
Source: PubMed Central journal article supplement (PMC3033264)
Supplement: 1008695108_pnas.1008695108_SI.pdf [file 1008695108_pnas.1008695108_SI.pdf]

# Supporting information

Fischer et al. 10.1073/pnas.1008695108

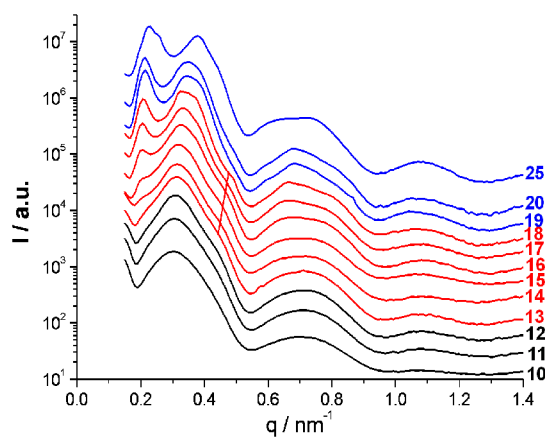

**Fig. S1.** Scattering curves of lyotropic phases of  $\text{PI}_{30}\text{-PEO}_{124}$  [poly(isoprene-*b*-ethylene oxide)] in the concentration range of 10–25%. The scattering curves between 13 and 18% are characterized by a pronounced suppression of the first order reflection concomitant with the presence of a pronounced shoulder at  $q = 0.45 \text{ nm}^{-1}$  indicated by the red line.

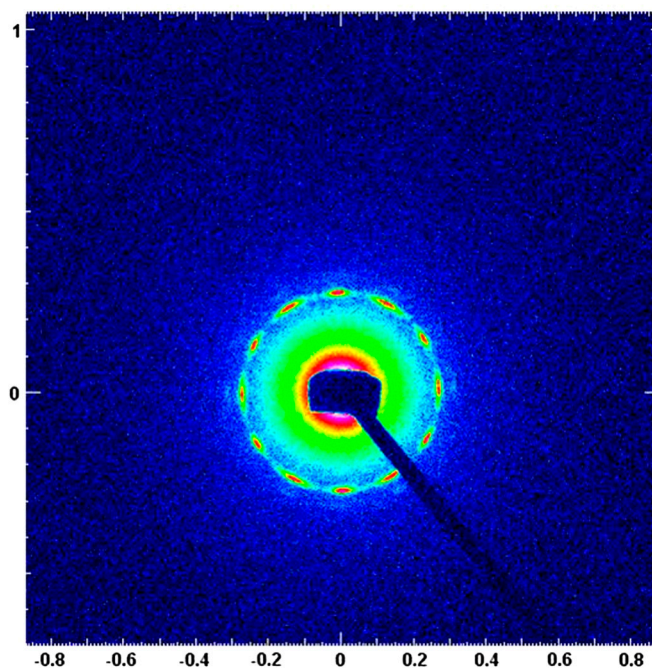

**Fig. S2.** Diffraction pattern of the Q12 phase measured with synchrotron small-angle X-ray scattering using a larger area detector (MAR CCD) to cover all 12 reflections.
